# Supplementary material for: Variability in CKD Biomarker Studies: Soluble Urokinase Plasminogen Activator Receptor (suPAR) and Kidney Disease Progression in the Chronic Kidney Disease in Children (CKiD) Study
Source: PubMed Central journal article supplement — Kidney Med. 2021 Jun 17;3(5):712–721.e1. doi: 10.1016/j.xkme.2021.04.007 (PMC8515077; doi:10.1016/j.xkme.2021.04.007), 2021-06-17
Supplement: mmc1.pdf [file mmc1.pdf]

**Table S1.** Comparison of Hazard Ratio (95%CI) and Relative time (95% CI) to composite event of end stage kidney disease or >50% decline in GFR Based on Weibull model<sup>‡</sup>.

| Weibull models                                                                                                                                                                                                                                                                                                                                                                                                                                     | Model 1: fully adjusted w/o eGFR |                   |       | Model 2: fully adjusted w eGFR |                   |       |
|----------------------------------------------------------------------------------------------------------------------------------------------------------------------------------------------------------------------------------------------------------------------------------------------------------------------------------------------------------------------------------------------------------------------------------------------------|----------------------------------|-------------------|-------|--------------------------------|-------------------|-------|
|                                                                                                                                                                                                                                                                                                                                                                                                                                                    | (n=541, events=184)              |                   |       | (n=541, events=184)            |                   |       |
| ELISA                                                                                                                                                                                                                                                                                                                                                                                                                                              | HR (95% CI)                      | RT (95% CI)       | p     | HR (95% CI)                    | RT (95% CI)       | p     |
| SuPAR                                                                                                                                                                                                                                                                                                                                                                                                                                              |                                  |                   |       |                                |                   |       |
| Quartiles:                                                                                                                                                                                                                                                                                                                                                                                                                                         |                                  |                   |       |                                |                   |       |
| Quartile 1                                                                                                                                                                                                                                                                                                                                                                                                                                         | 1                                | 1                 | ref   | 1                              | 1                 | ref   |
| Quartile 2 (vs. 1)                                                                                                                                                                                                                                                                                                                                                                                                                                 | 1.93 (1.17, 3.18)                | 0.34 (0.15, 0.77) | 0.01  | 1.47 (0.89, 2.43)              | 0.52 (0.23, 1.22) | 0.13  |
| Quartile 3 (vs. 1)                                                                                                                                                                                                                                                                                                                                                                                                                                 | 2.66 (1.62, 4.37)                | 0.20 (0.09, 0.45) | <.001 | 1.70 (1.02, 2.82)              | 0.41 (0.18, 0.96) | 0.041 |
| Quartile 4 (vs. 1)                                                                                                                                                                                                                                                                                                                                                                                                                                 | 3.37 (2.07, 5.46)                | 0.14 (0.06, 0.30) | <.001 | 1.75 (1.04, 2.96)              | 0.39 (0.16, 0.94) | 0.036 |
| MSD                                                                                                                                                                                                                                                                                                                                                                                                                                                | HR (95% CI)                      | RT (95% CI)       | p     | HR (95% CI)                    | RT (95% CI)       | p     |
| SuPAR                                                                                                                                                                                                                                                                                                                                                                                                                                              |                                  |                   |       |                                |                   |       |
| Quartiles:                                                                                                                                                                                                                                                                                                                                                                                                                                         |                                  |                   |       |                                |                   |       |
| Quartile 1                                                                                                                                                                                                                                                                                                                                                                                                                                         | 1                                | 1                 | ref   | 1                              | 1                 | ref   |
| Quartile 2 (vs. 1)                                                                                                                                                                                                                                                                                                                                                                                                                                 | 1.16 (0.68, 1.98)                | 0.79 (0.33, 1.88) | 0.59  | 0.78 (0.45, 1.35)              | 1.50 (0.61, 3.71) | 0.38  |
| Quartile 3 (vs. 1)                                                                                                                                                                                                                                                                                                                                                                                                                                 | 2.28 (1.39, 3.74)                | 0.26 (0.12, 0.59) | 0.001 | 1.04 (0.61, 1.77)              | 0.94 (0.39, 2.27) | 0.89  |
| Quartile 4 (vs. 1)                                                                                                                                                                                                                                                                                                                                                                                                                                 | 2.84 (1.75, 4.63)                | 0.18 (0.08, 0.40) | <.001 | 1.01 (0.57, 1.78)              | 0.98 (0.38, 2.51) | 0.97  |
| Model 1: Adjusted for age, gender plus hypertension (systolic/diastolic BP percentiles), BMI z-score, glomerular diagnosis, UP/c.<br>Model 2: Model 1 plus eGFR.<br>‡Relative Time (RT) is calculated from the Weibull model as $\exp(\beta)$ where $\beta$ is the parameter estimated for SuPAR. Relative Hazard (HR) is calculated from the Weibull model as $\exp(-\beta/\alpha)$ where $\alpha$ is the scale parameter from the Weibull model. |                                  |                   |       |                                |                   |       |
